# Supplementary material for: Health-related quality of life in patients with diabetic foot ulceration: study protocol for adaptation and validation of patient-reported outcome measurements (PROMs) in Dutch-speaking patients
Source: PubMed Central journal article supplement — BMJ Open. 2019 Dec 23;9(12):e034491. doi: 10.1136/bmjopen-2019-034491 (PMC7008415; doi:10.1136/bmjopen-2019-034491), 2019-12-23
Supplement: bmjopen-2019-034491.reviewer_comments.pdf [file bmjopen-2019-034491.reviewer_comments.pdf]

## PEER REVIEW HISTORY

BMJ Open publishes all reviews undertaken for accepted manuscripts. Reviewers are asked to complete a checklist review form (<http://bmjopen.bmj.com/site/about/resources/checklist.pdf>) and are provided with free text boxes to elaborate on their assessment. These free text comments are reproduced below.

### ARTICLE DETAILS

|                            |                                                                                                                                                                                                     |
|----------------------------|-----------------------------------------------------------------------------------------------------------------------------------------------------------------------------------------------------|
| <b>TITLE (PROVISIONAL)</b> | Health related quality of life in patients with diabetic foot ulceration: study protocol for adaptation and validation of PROM's (patient reported outcome measurements) in Dutch-speaking patients |
| <b>AUTHORS</b>             | Rezaie, Wahid; Lusendi, Flora; Doggen, Kris; Matricali, Giovanni; Nobels, Frank                                                                                                                     |

### VERSION 1 – REVIEW

|                        |                                                                                                          |
|------------------------|----------------------------------------------------------------------------------------------------------|
| <b>REVIEWER</b>        | Jana Nemcova<br>Comenius University in Bratislava<br>Jessenius Faculty of Medicine in Martin<br>Slovakia |
| <b>REVIEW RETURNED</b> | 17-Oct-2019                                                                                              |

|                         |                                                                                                                                                                                                                                                                                                                                                  |
|-------------------------|--------------------------------------------------------------------------------------------------------------------------------------------------------------------------------------------------------------------------------------------------------------------------------------------------------------------------------------------------|
| <b>GENERAL COMMENTS</b> | <p>The article presents systematic and scientific approach in validation of measurements: DFS-SF and LEFS. It is the most important basis for next research in the problems of patients with DFU by using PROMs methods.</p> <p>The reviewer provided a marked copy with additional comments. Please contact the publisher for full details.</p> |
|-------------------------|--------------------------------------------------------------------------------------------------------------------------------------------------------------------------------------------------------------------------------------------------------------------------------------------------------------------------------------------------|

|                        |                                              |
|------------------------|----------------------------------------------|
| <b>REVIEWER</b>        | Gabriel Gijon<br>University of Malaga. Spain |
| <b>REVIEW RETURNED</b> | 27-Oct-2019                                  |

|                         |                                                                                                                                                                                                                                                                                                                                                                                                                                                                                                                                                                 |
|-------------------------|-----------------------------------------------------------------------------------------------------------------------------------------------------------------------------------------------------------------------------------------------------------------------------------------------------------------------------------------------------------------------------------------------------------------------------------------------------------------------------------------------------------------------------------------------------------------|
| <b>GENERAL COMMENTS</b> | <p>Dear authors:</p> <p>It has been a pleasure to review your paper about "Health related quality of life in patients with diabetic foot ulceration: study protocol for adaptation and validation of PROM's (patient reported outcome measurements) in Dutch-speaking patients." Only I have one suggestion to change before to be accept it</p> <p>You can see below the recommendation</p> <p>In section method, when you explain the part (page 6 and 7) can you be a little more clear and increase this lines (page 6 line 27-60 and page 7 line 3-23)</p> |
|-------------------------|-----------------------------------------------------------------------------------------------------------------------------------------------------------------------------------------------------------------------------------------------------------------------------------------------------------------------------------------------------------------------------------------------------------------------------------------------------------------------------------------------------------------------------------------------------------------|

|                        |                                                                                                                       |
|------------------------|-----------------------------------------------------------------------------------------------------------------------|
| <b>REVIEWER</b>        | Beata Mrozikiewicz-Rakowska<br>Department of Diabetology and Metabolic Diseases, Medical University of Warsaw, Poland |
| <b>REVIEW RETURNED</b> | 01-Nov-2019                                                                                                           |

|                         |                                                                                                                                                                                                                                                                                                                                                                                                                                                                                                                                               |
|-------------------------|-----------------------------------------------------------------------------------------------------------------------------------------------------------------------------------------------------------------------------------------------------------------------------------------------------------------------------------------------------------------------------------------------------------------------------------------------------------------------------------------------------------------------------------------------|
| <b>GENERAL COMMENTS</b> | The authors undertake very important objective to validate and adapt the special scales based on patient reported outcome measurements in Dutch-speaking patients with diabetic foot. The study imprints in the mainstream of the world tendency to deliver the best quality of scales dedicated to the very high risk group of patients. The principles of constructing the protocol are very well documented and built the trust to deliver the valuable tool to assess the quality of life and functioning of patients with diabetic foot. |
|-------------------------|-----------------------------------------------------------------------------------------------------------------------------------------------------------------------------------------------------------------------------------------------------------------------------------------------------------------------------------------------------------------------------------------------------------------------------------------------------------------------------------------------------------------------------------------------|

### **VERSION 1 – AUTHOR RESPONSE**

Reviewer: 1

We thank the Reviewer for this precious encouragement.

Reviewer: 2

We thank the Reviewer for providing us with this valuable suggestion. Following this comment, we have revised our paper by adding more explanation about study design in part 1 to 3.

Reviewer: 3

We warmly thank the Reviewer for this positive feedback.
